# Supplementary material for: Mechanistic insights into the rhodium catalysed dehydrogenative cycloaddition of cyano-yne-allene substrates
Source: Royal Society of Chemistry journal article supplement (doi:10.1039/d4qo00378k), 2024-01-01
Supplement: d4qo00378k1.pdf [file d4qo00378k1.pdf]

## SUPPORTING INFORMATION

### **Mechanistic insights into the rhodium catalysed dehydrogenative cycloaddition of cyano-yne-allene substrates**

Àlex Díaz-Jiménez,<sup>a</sup> Anna Roglans,<sup>a</sup> Miquel Solà<sup>\*,a</sup>, Anna Pla-Quintana<sup>\*,a</sup>

<sup>a</sup> Institut de Química Computacional i Catàlisi (IQCC) and Departament de Química, Universitat de Girona (UdG), Facultat de Ciències, C/ Maria Aurèlia Capmany, 69, 17003-Girona, Catalunya, Spain.

# CONTENTS

|                                                                                                           |    |
|-----------------------------------------------------------------------------------------------------------|----|
| 1. Computational data .....                                                                               | 3  |
| 2. Comparison of the deformation energy in transition state structures TSA1A2 and TSB1B2 ...              | 3  |
| 3. Study of alternative pathways .....                                                                    | 4  |
| 3.1. Comparison of the deprotonation of A2 and A3 with nitrile insertion on A3. ....                      | 4  |
| 3.2. Comparison of the deprotonation of A2' and A3' with nitrile insertion on A3'.....                    | 5  |
| 3.3. Comparison of the N protonation versus Cl abstraction in A6.....                                     | 7  |
| 3.4. Comparison of the Rh-catalyzed versus Et <sub>3</sub> N mediated deprotonation of A9.....            | 8  |
| 3.5. Computed energy profile for B pathway. ....                                                          | 11 |
| 4. Molecular structures of A4, A4' and substituted allenes A4Ext and A4Int .....                          | 12 |
| 5. Study of the steric difference between the internal and external allene carbons in A4 and A4'<br>..... | 14 |

## 1. Computational data

All DFT data obtained within this study are provided through the following link:  
<https://iochem.udg.edu/browse/handle/100/5173>

## 2. Comparison of the deformation energy in transition state structures TSA1A2 and TSB1B2

Table S1. Deformation energy data for TSA1A2 and TSB1B2

|                                                                    |                         |
|--------------------------------------------------------------------|-------------------------|
| <b>TSA1A2</b>                                                      |                         |
| $\Delta E$ Rhodium fragment                                        | 9.1122 kcal/mol         |
| $\Delta E$ ene-yne-nitrile fragment                                | 78.5617 kcal/mol        |
| Total value $\Delta E$                                             | 87.6740 kcal/mol        |
| <b>TSB1B2</b>                                                      |                         |
| $\Delta E$ Rhodium fragment                                        | 6.1193 kcal/mol         |
| $\Delta E$ ene-yne-nitrile fragment                                | 85.0384 kcal/mol        |
| Total value $\Delta E$                                             | 91.1577 kcal/mol        |
| <b><math>\Delta E</math> TSB1B2 - <math>\Delta E</math> TSA1A2</b> | <b>3.48375 kcal/mol</b> |

Geometry analysis was conducted on the **1a** moiety in **TSA1A2** and **TSB1B2**, revealing that the major deformation of **1a** in **TSB1B2** arises from the strained angles around the former central carbon of the allene. During the oxidative cyclization this central carbon rehybridizes from  $sp$  to  $sp^2$ . In **TSB1B2** the angles around this carbon significantly deviate from the expected  $120^\circ$  for an  $sp^2$  carbon, primarily due to the strained angle in the forming rhodacyclopentene moiety. This strain becomes evident when comparing the angles with those of intermediate **B2**. Conversely, the corresponding deformations around this carbon in **TSA1A2** are notably minor, consistent with the decreased computed deformation energy.

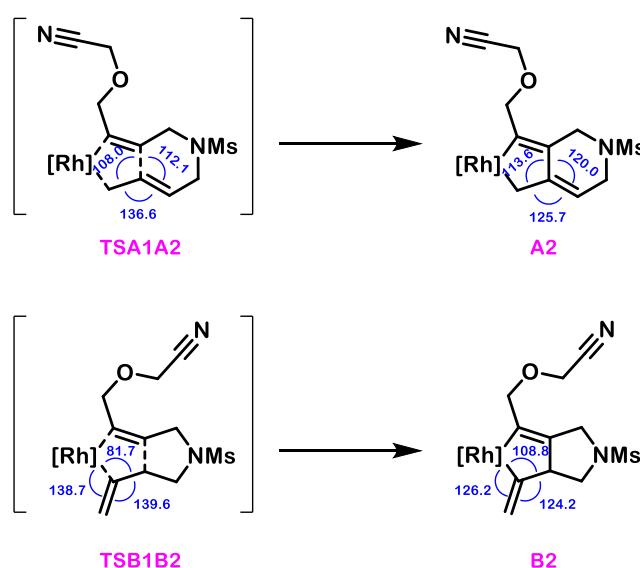

**Scheme S1.** DFT calculations for the deprotonation of **A2** and **A3** (lines and structures in blue) and comparison with nitrile insertion on **A3** through **TSA3A4**.

### 3. Study of alternative pathways

#### 3.1. Comparison of the deprotonation of **A2** and **A3** with nitrile insertion on **A3**.

Deprotonation from **A2** was found to have an activation energy of 30.6 kcal/mol, which is notably higher than nitrile insertion on **A3**, which has an activation energy of 8.8 kcal/mol (Figure S1). The barrier for the deprotonation from **A3** could not be located. However, the **A3\_NEt3** adduct has already an energy of 4.5 kcal/mol (Figure S1), only 0.8 kcal/mol lower than **TSA3A4**, and a scan on the C-H distance (Figure S2) showed that the barrier is not lower than 28 kcal/mol letting thus to disregard both options.

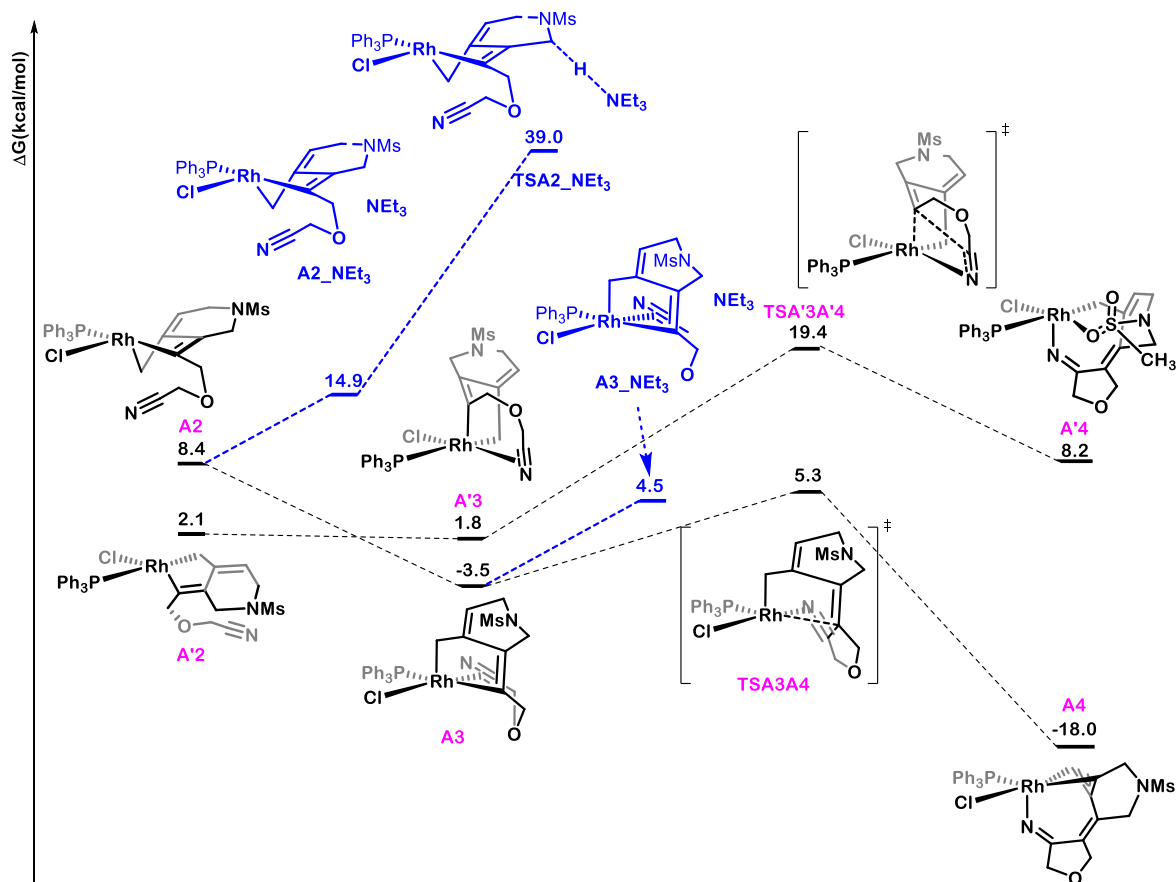

**Figure S1.** DFT calculations for the deprotonation of **A2** and **A3** (lines and structures in blue) and comparison with nitrile insertion on **A3** through **TSA3A4**.

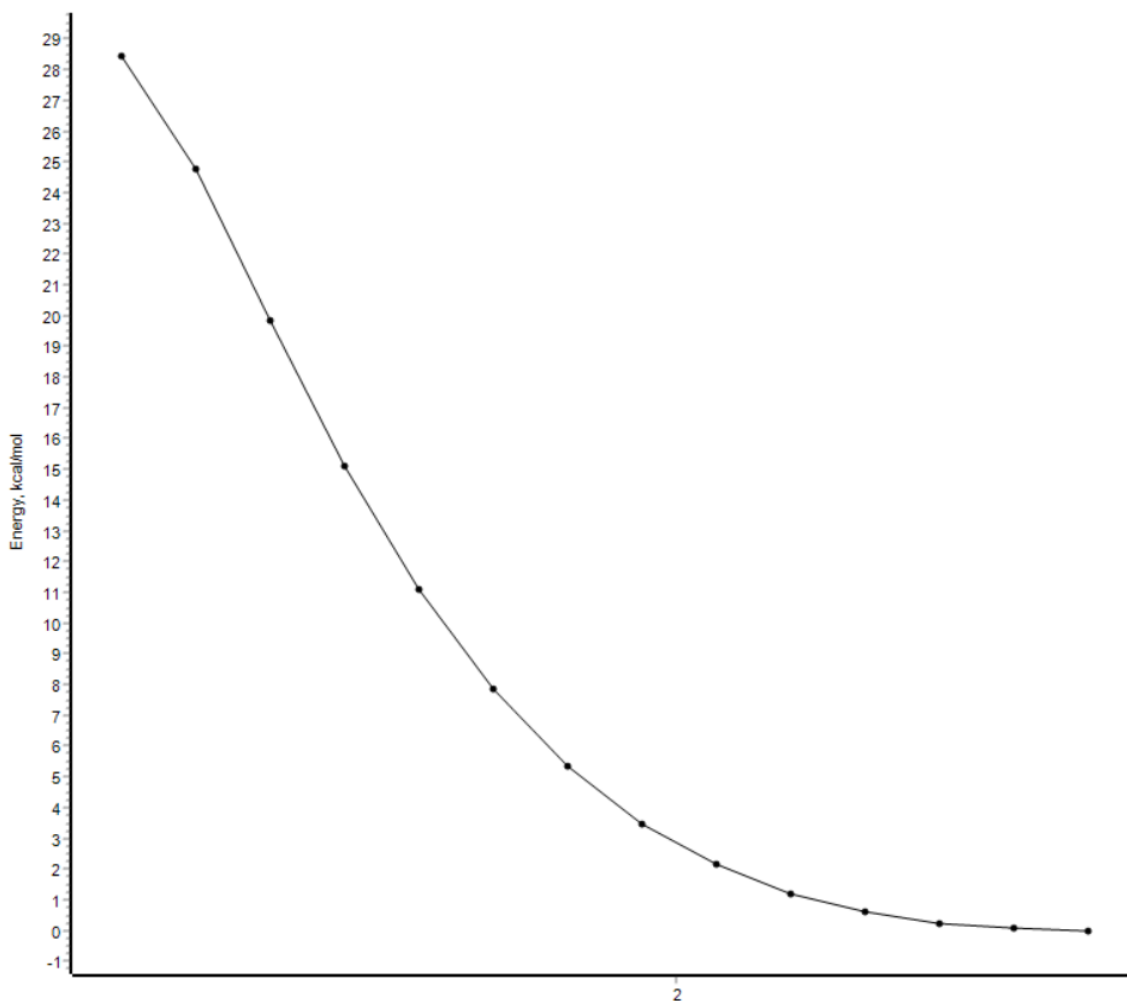

**Figure S2.** Scan on the C-H distance for the deprotonation of **A3\_NEt3**.

### 3.2. Comparison of the deprotonation of A2' and A3' with nitrile insertion on A3'.

Deprotonation from A2' was found to have an activation energy of 22.3 kcal/mol, which is higher than nitrile insertion on A3', which has an activation energy of 17.6 kcal/mol (Figure S3). The barrier for the deprotonation from A3' could not be located. However, the A3'\_Et3N adduct has already an energy of 11.7 kcal/mol (Figure S3), and a scan on the C-H distance (Figure S4) showed that the barrier is not lower than 30 kcal/mol letting us again to disregard both options.

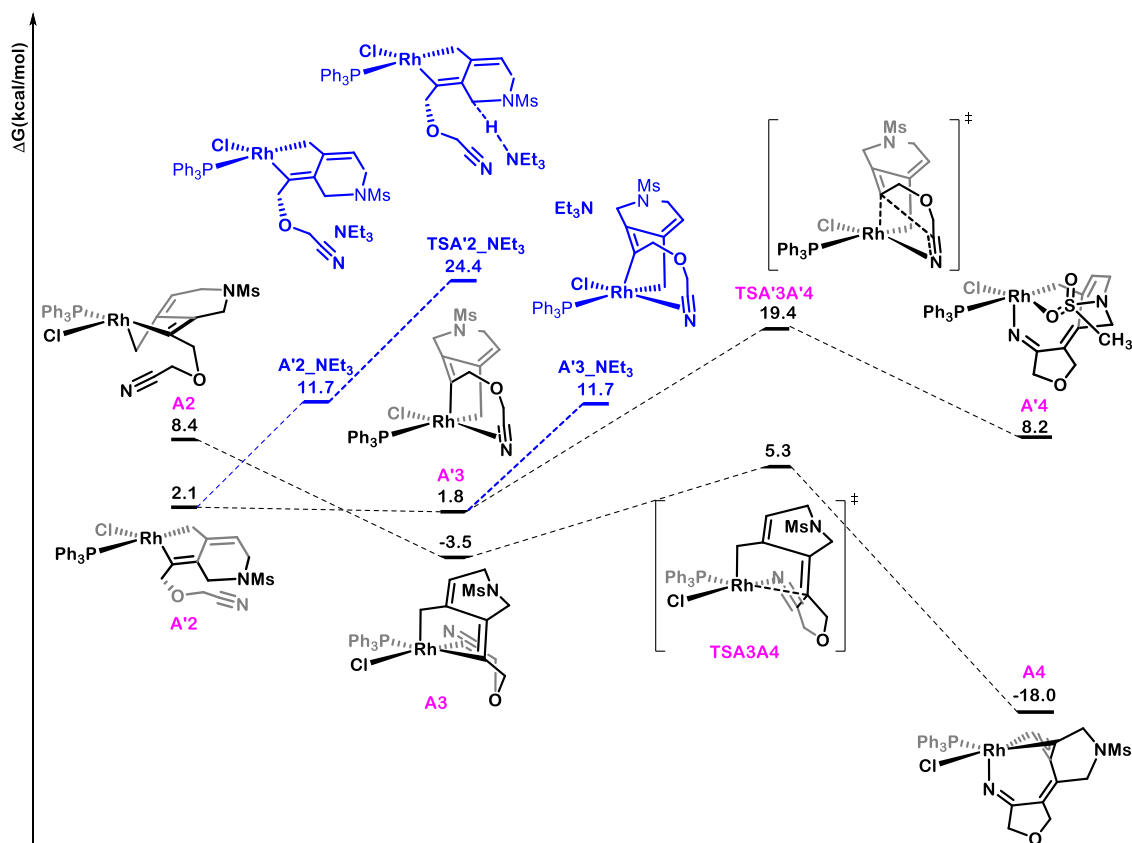

**Figure S3.** DFT calculations for the deprotonation of **A2'** and **A3'** (lines and structures in blue) and comparison with nitrile insertion on **A3'** through **TSA3'A4'**.

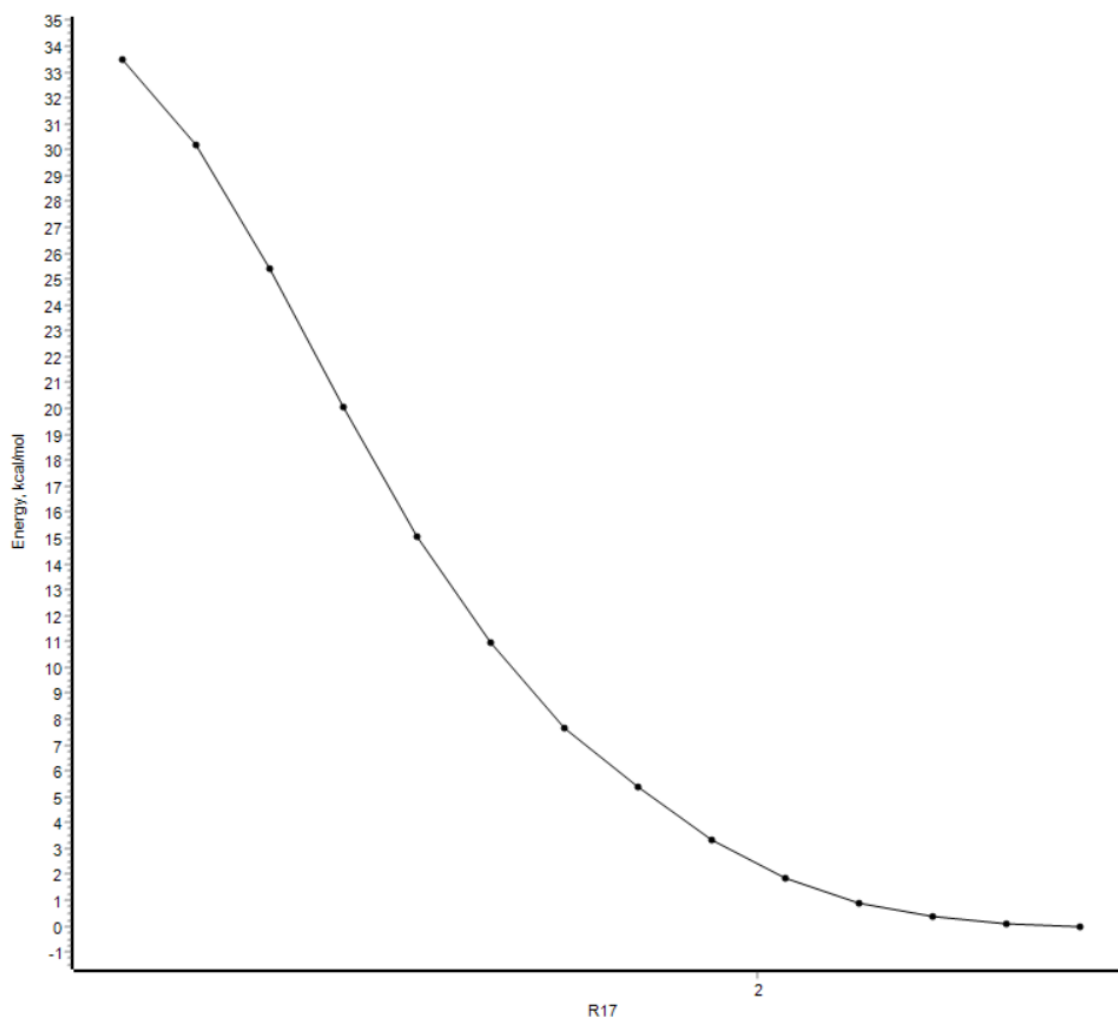

**Figure S4.** Scan on the C-H distance for the deprotonation of **A3\_NEt3**.

### 3.3. Comparison of the N protonation versus Cl abstraction in **A6**.

The thermodynamics for the chloride abstraction from **A6** to form neutral rhodium complex together with  $[\text{HNEt}_3]^+\text{Cl}^-$  contact ion pair (**A6\_HNEt3Cl**) has been computed and compared to the protonation of the nitrogen to form **A7**. Formation of **A7** has been found to be thermodynamically more favorable than chloride abstraction.

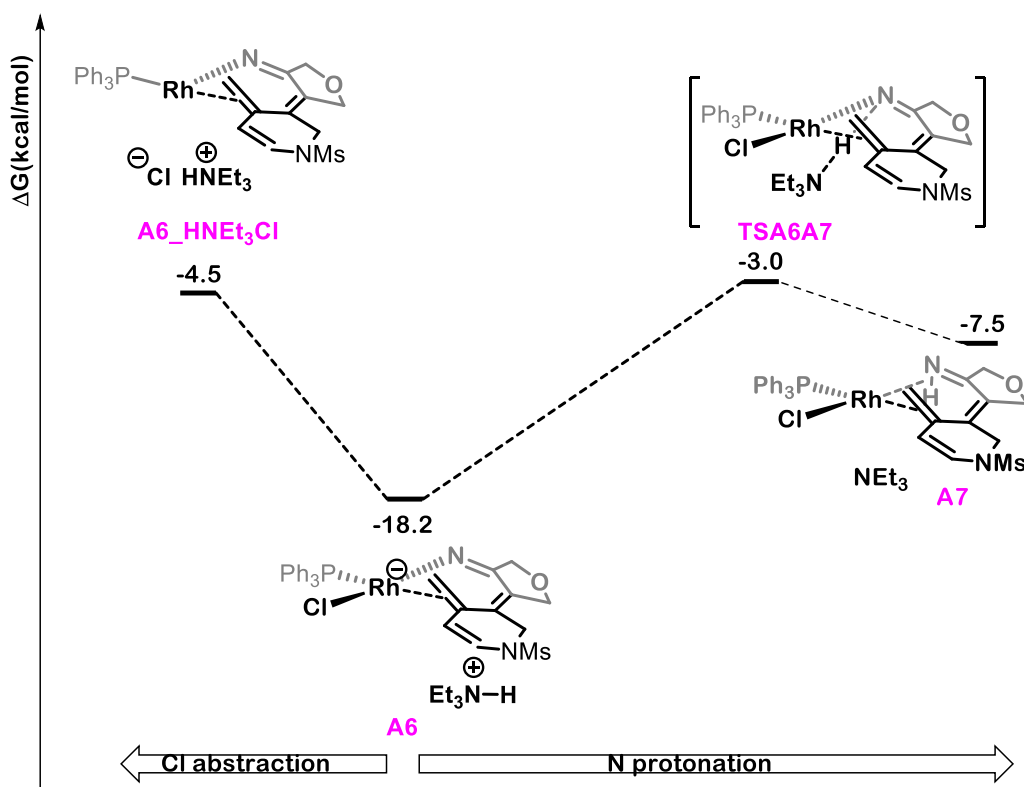

**Figure S5.** DFT calculations for the chloride abstraction from **A6** and comparison with nitrogen protonation through **TSA6A7**.

### 3.4. Comparison of the Rh-catalyzed versus Et<sub>3</sub>N mediated deprotonation of **A9**.

Three different pathways for the deprotonation of **A9** have been evaluated (Figure S6). The rhodium-catalyzed pathway through **TSA9A10** was found to have a barrier of 23 kcal/mol. The triethylamine-mediated deprotonation of **A9**, with rhodium coordinated to the amine, was found to have a barrier of 33.4 kcal/mol. Conversely, the barrier for the triethylamine-mediated deprotonation on intermediate **A9'**, not coordinated to rhodium, could not be located. However, the **A9'\_Et<sub>3</sub>N** adduct has already an energy of -36.9 kcal/mol (Figure S6), and a scan on the N-H distance (Figure S7) showed that the barrier is not lower than 175 kcal/mol. Thus, the triethylamine-mediated pathways were disregarded.



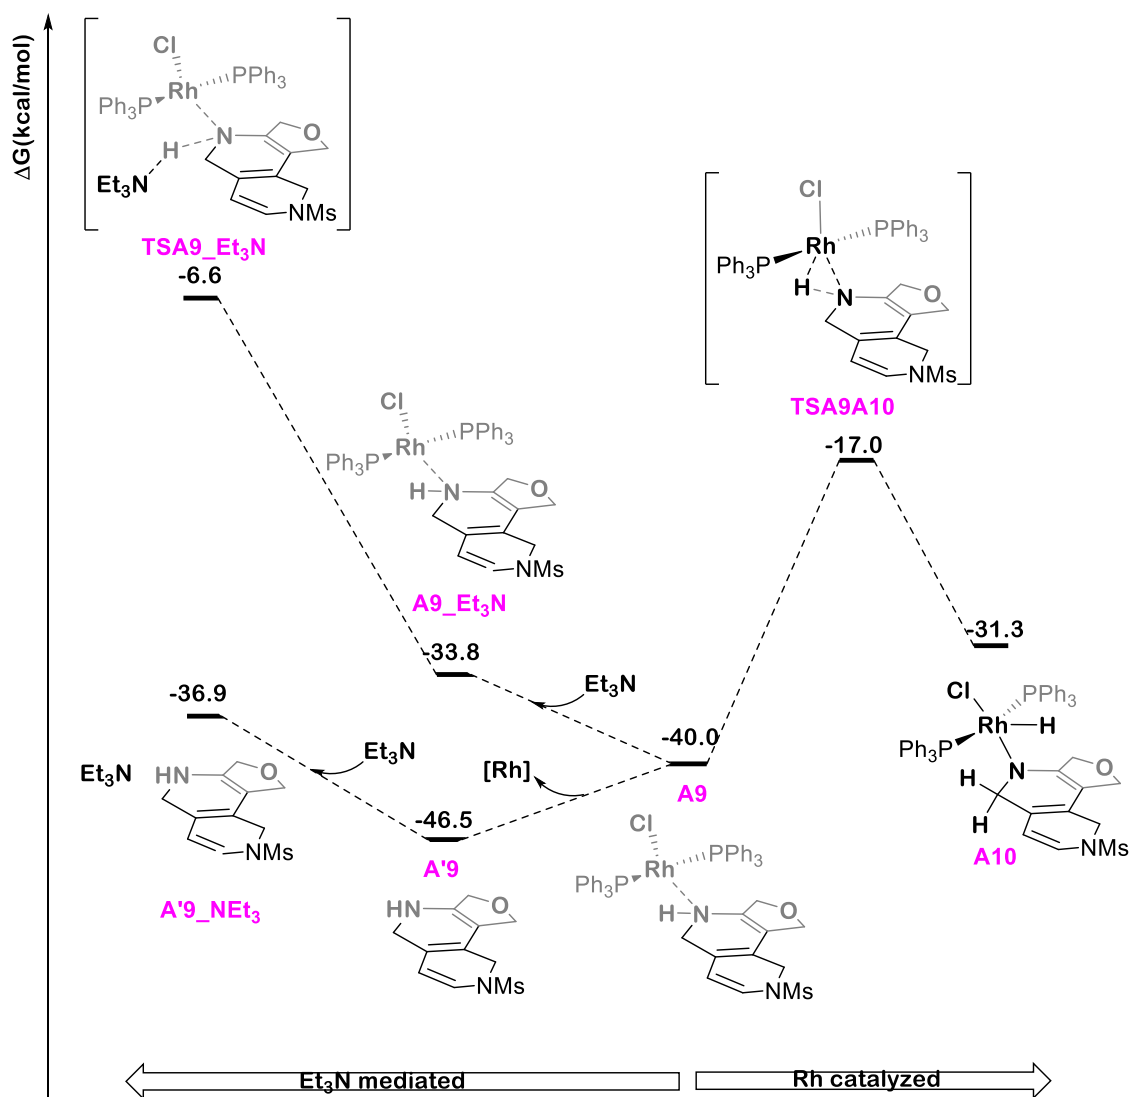

**Figure S6.** DFT calculations for the  $\text{Et}_3\text{N}$  mediated deprotonation of **A9** and comparison with the rhodium-catalyzed pathway through **TSA9A10**.

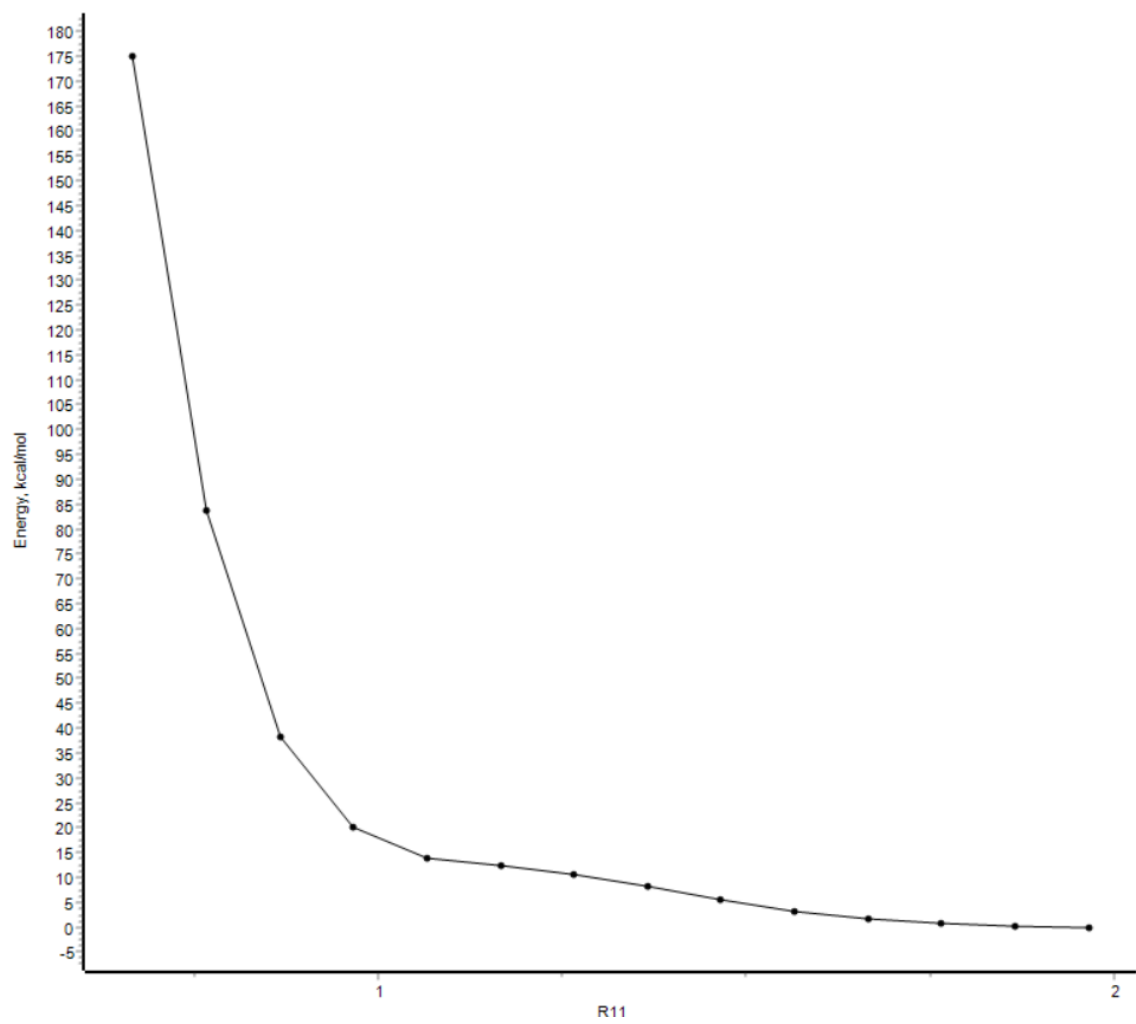

**Figure S7.** Scan on the N-H distance for the deprotonation of **A9'\_NET3**.

### 3.5. Computed energy profile for B pathway.

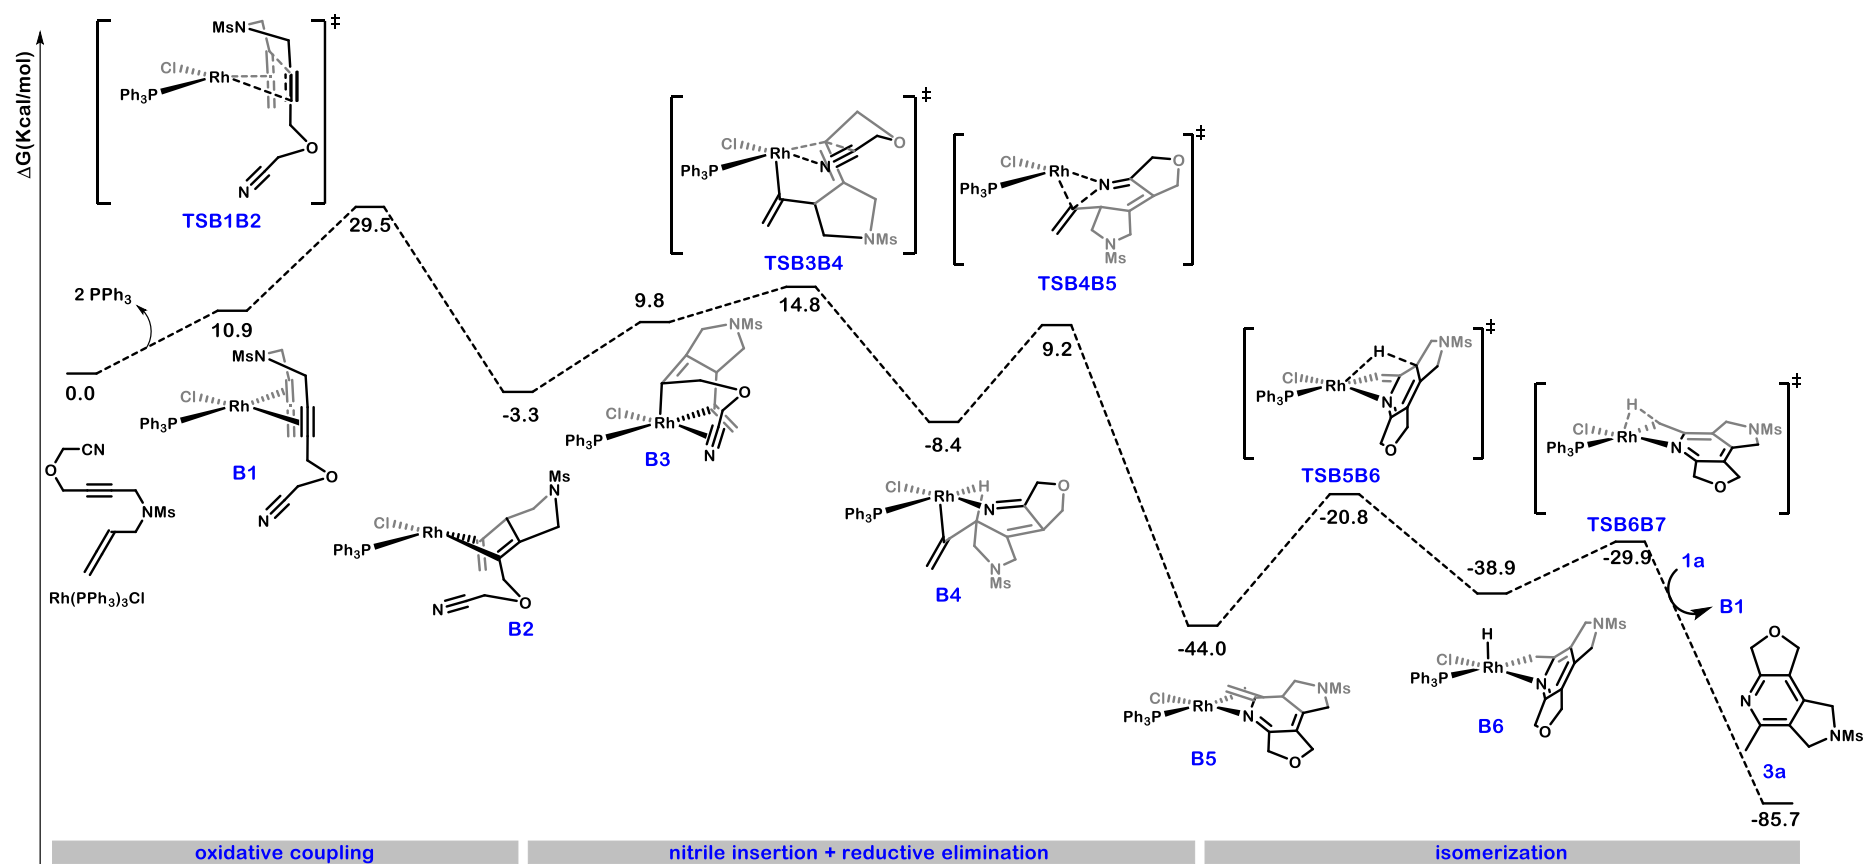

**Figure S8.** Gibbs energy for B pathway. Relative Gibbs energies (393.15 K) with respect to **1a** and [RhCl(PPh<sub>3</sub>)<sub>3</sub>] are shown in kcal/mol.

#### 4. Molecular structures of A4, A4' and substituted allenes A4Ext and A4Int

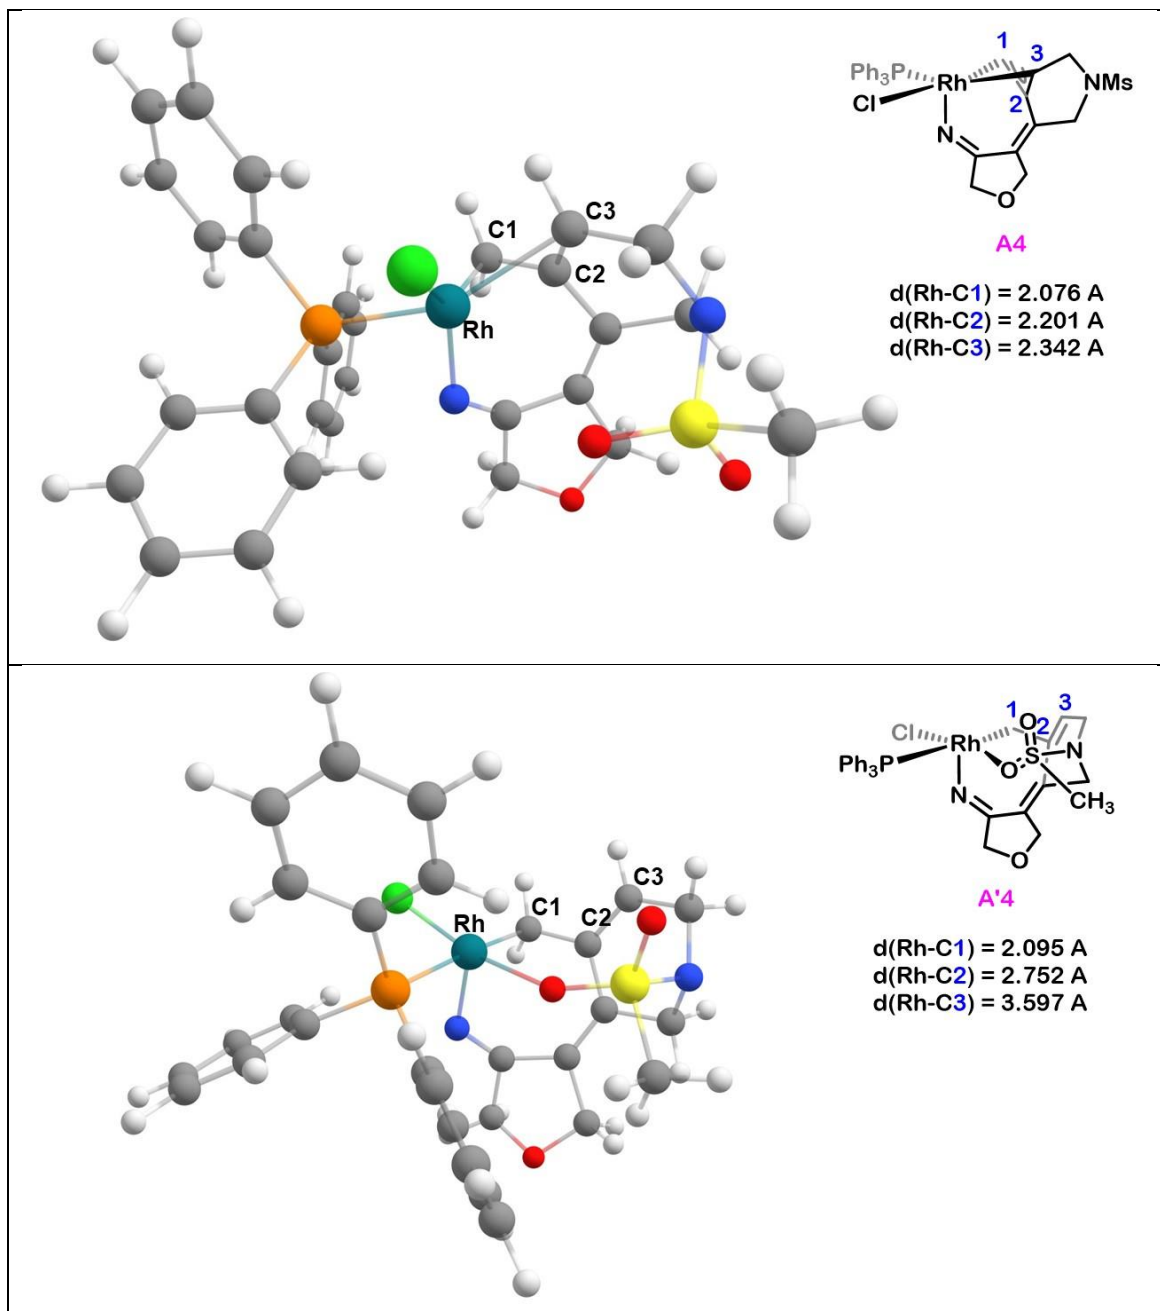

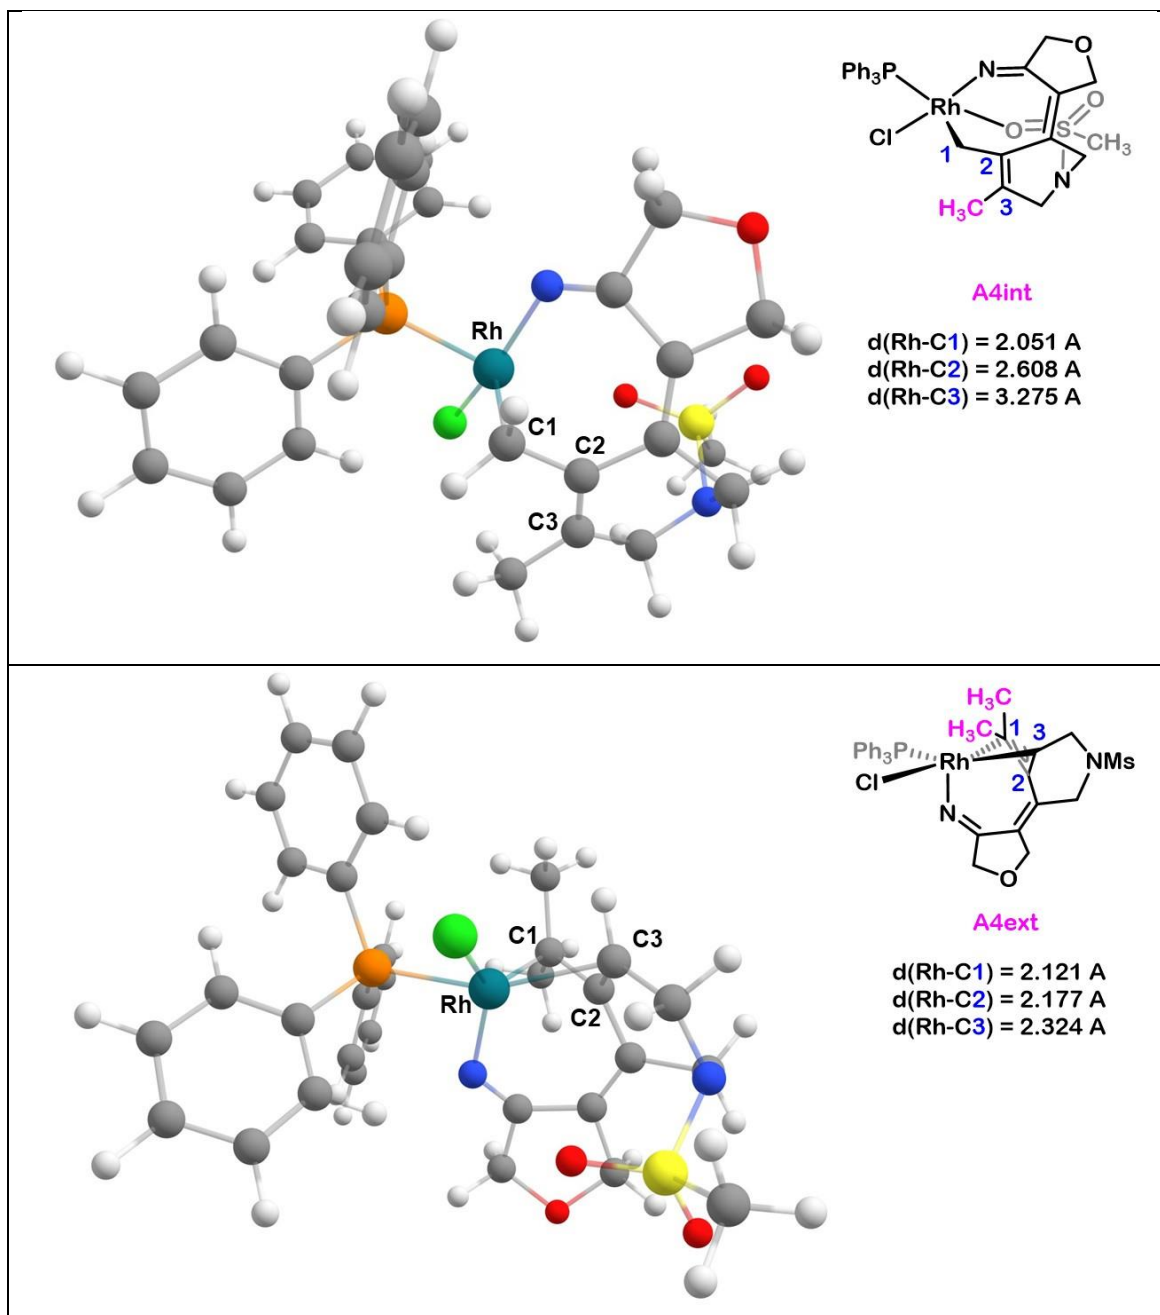

**Figure S9.** Molecular structure of intermediates **A4**, **A'4**, **A4int**, and **A4ext**; selected distances in Å.

## 5. Study of the steric difference between the internal and external allene carbons in A4 and A4'

|                   | A4-Internal carbon | A4-External Carbon | A'4-Internal carbon | A'4-External Carbon |
|-------------------|--------------------|--------------------|---------------------|---------------------|
| %V <sub>Bur</sub> | 79 %               | 73.4 %             | 75.2 %              | 66 %                |

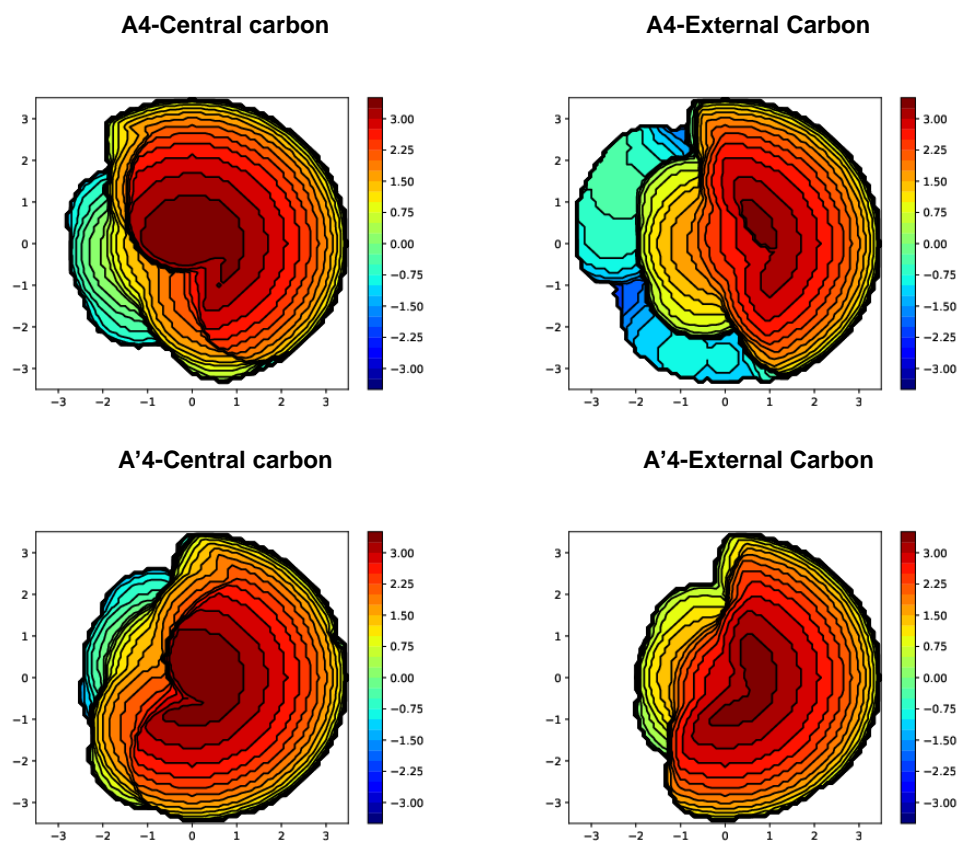

Figure S10.  $\%V_{bur}$  values in the internal and external carbon of the allene for A4 and A'4.
